# Supplementary material for: Defect engineering of solution-processed ZnO:Li window layers towards high-efficiency and low-cost kesterite photovoltaics
Source: Royal Society of Chemistry journal article supplement (doi:10.1039/d3ta01431b), 2023-01-01
Supplement: d3ta01431b1.pdf [file d3ta01431b1.pdf]

## Supporting Information

### **Defect Engineering of Solution-Processed ZnO:Li Window Layer Towards High-Efficiency and Low-Cost Kesterite Photovoltaics**

Qian Xiao<sup>a</sup>, Dongxing Kou<sup>a\*</sup>, Wenhui Zhou<sup>a</sup>, Zhengji Zhou<sup>a</sup>, Shengjie Yuan<sup>a</sup>, Yafang Qi<sup>a</sup>, Yuena Meng<sup>a</sup>, Litao Han<sup>a</sup>, Zhi Zheng<sup>b</sup>, and Sixin Wu<sup>a\*</sup>

*<sup>a</sup> Key Lab for Special Functional Materials, Ministry of Education, National & Local Joint Engineering Research Center for High-Efficiency Display and Lighting Technology, School of Materials Science and Engineering, Collaborative Innovation Center of Nano Functional Materials and Applications, Henan University, Kaifeng 475004, China.*

*<sup>b</sup> Inst Surface Micro & Nano Mat, Coll Adv Mat & Energy, Key Lab Micronano Energy Storage & Convers Mat He, Xuchang University, Xuchang, Henan 461000, China.*

*E-mail: koudongxing@henu.edu.cn; wusixin@henu.edu.cn*

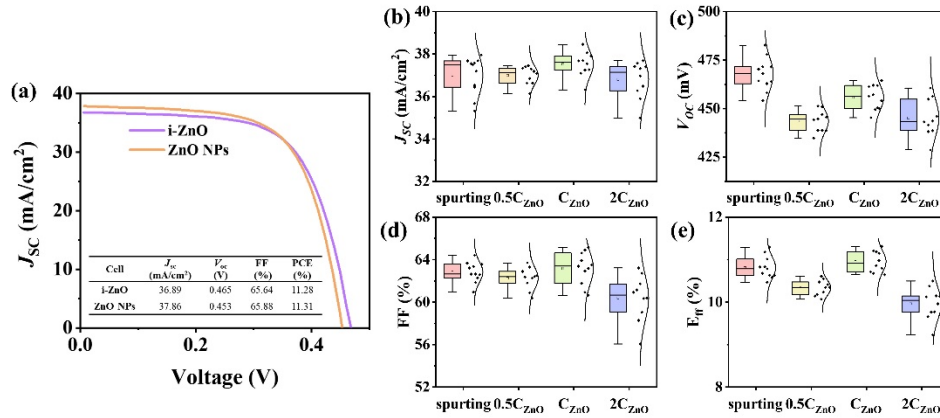

**Figure S1** Statistical box diagrams of  $J$ - $V$  curves,  $J_{sc}$ ,  $V_{oc}$ , FF and PCE for CZTSSe solar cells with different ZnO NPs solution concentration.

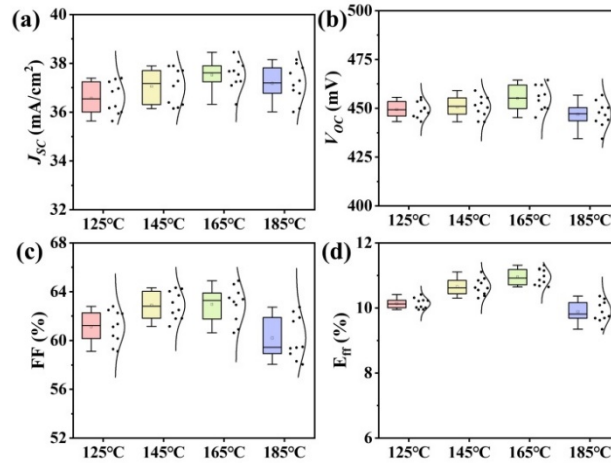

**Figure S2** Statistical box diagrams of  $J_{sc}$ ,  $V_{oc}$ , FF and PCE for CZTSSe solar cells at different ZnO NPs window layer annealing temperature.

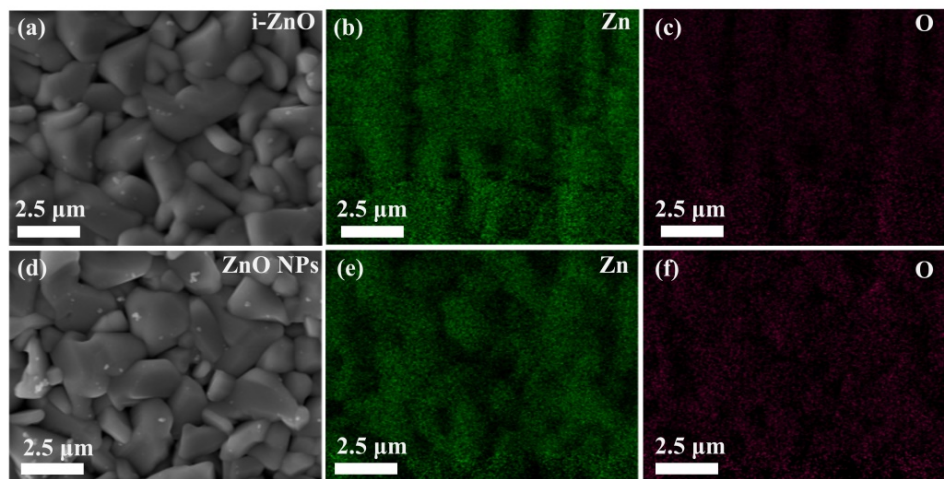

**Figure S3.** The SEM top-view images of the (a) sputtered i-ZnO/CdS/CZTSSe stack and (d) ZnO NPs/CdS/CZTSSe stack. The surface EDS element mapping of (b) Zn and (c) O for i-ZnO and (e) Zn and (f) O for ZnO NPs.

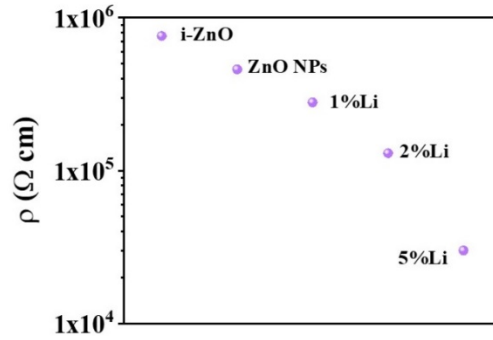

**Figure S4** The resistivity  $\rho$  of sputtered i-ZnO and ZnO:Li NPs films with different Li content on soda-lime glass.

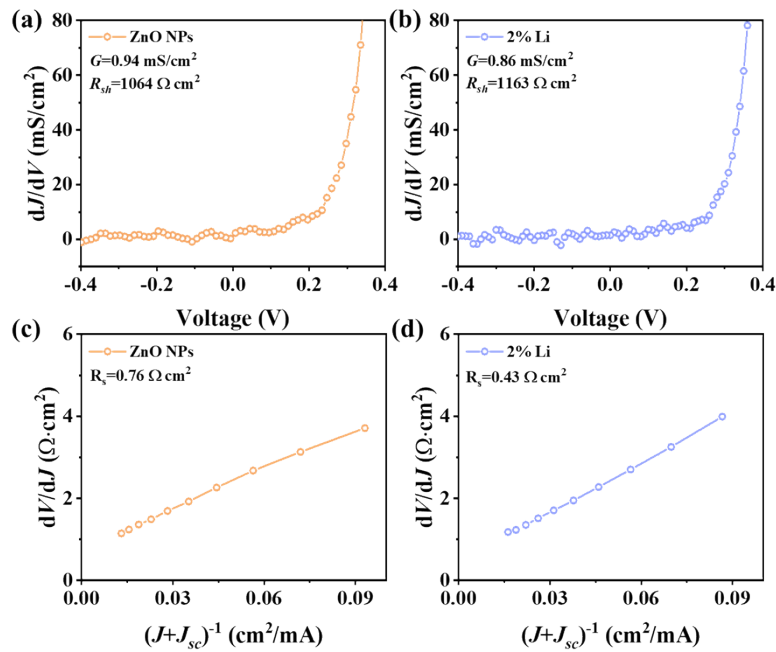

**Figure S5** (a)-(b) are the shunt resistance and (c)-(d) are the series resistance of CZTSSe solar cells using ZnO NPs and ZnO:Li NPs window layer, respectively.

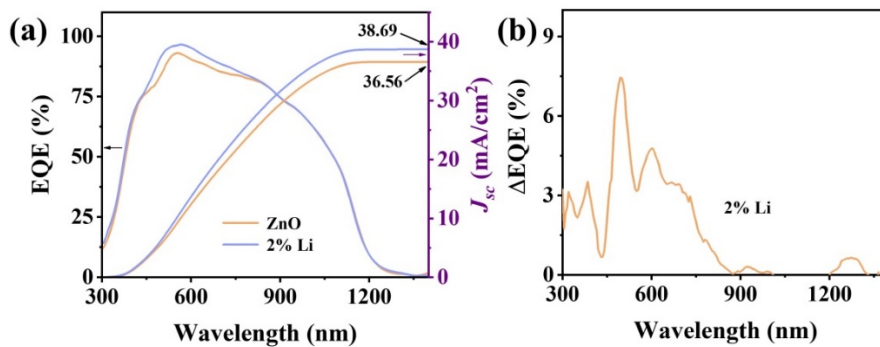

**Figure S6.** (a) EQE curves of CZTSSe solar cells using ZnO NPs and ZnO:Li NPs window layer. (b) The EQE difference ( $\Delta$ EQE) of the CZTSSe solar cells before and after 2% Li doping.

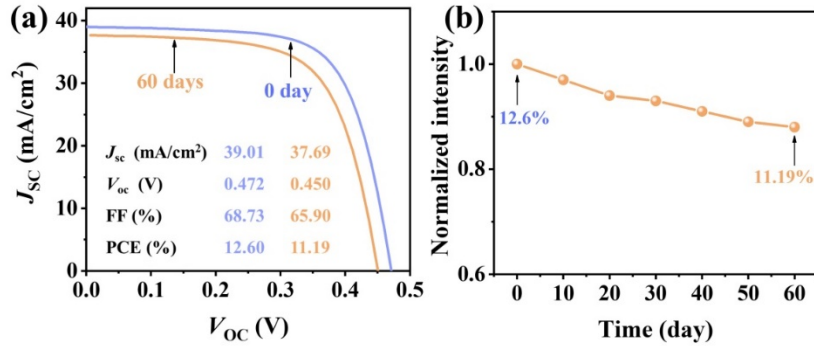

**Figure S7** (a) The  $J$ - $V$  curves of CZTSSe solar cells with 2% Li doping ZnO layer before and after 60 days storage. (b) The efficiency stability within 60 days for the champion CZTSSe device with 2% Li doping ZnO layer.

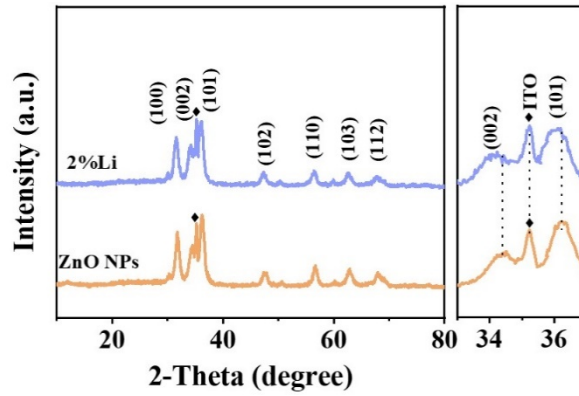

**Figure S8** XRD of the pristine ZnO NPs and 2% ZnO:Li NPs films deposited on ITO glass.

$$q = \frac{2\pi}{d} = \frac{4\pi \sin\theta}{\lambda}$$

$$\frac{1}{d_{hkl}^2} = \frac{4}{3} \left( \frac{h^2 + hk + k^2}{a^2} \right) + \frac{1}{c^2}$$

$\lambda=1.5406$  nm,  $a$ ,  $b$  and  $c$  are cell parameters,  $(hkl)$  is the crystal face index,  $d$  is the interplanar spacing and  $2\theta$  is the diffraction angle. The unit cell parameters of ZnO wurtzite follow the principle that  $a=b \neq c$ ,  $\alpha=\beta=90^\circ$ ,  $\gamma=120^\circ$ . For the main peak (002) plane, the lattice parameters of pristine ZnO and ZnO:Li NPs are evaluated to be  $a=b=3.4216$ ,  $c=5.4547$  and  $a=b=3.4340$ ,  $c=5.4830$ , respectively.

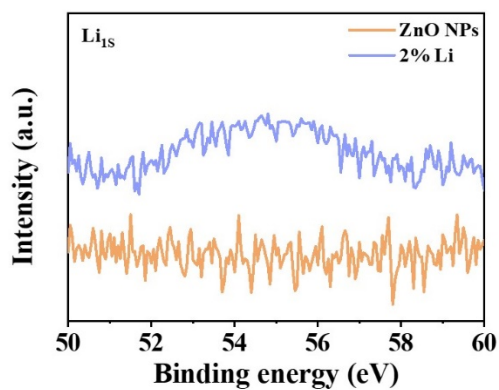

**Figure S9** Li<sub>1s</sub> of XPS for the pristine ZnO NPs and 2% ZnO:Li NPs films deposited on glass.

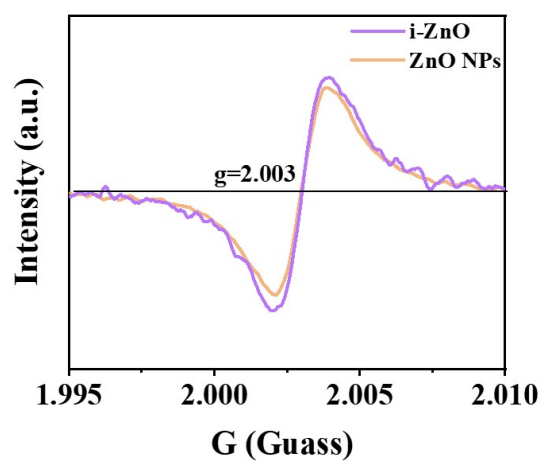

**Figure S10.** EPR of sputtered i-ZnO and solution-processed ZnO NPs films.

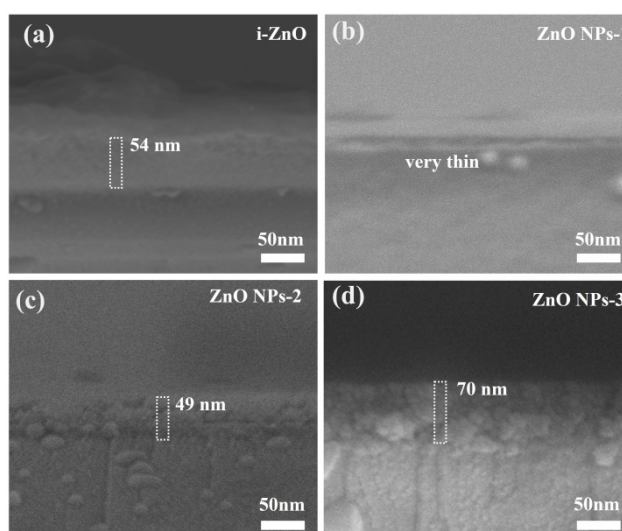

**Figure S11** SEM cross-section morphologies of the (a) i-ZnO, (b) one layer of ZnO NPs films, (c) two layers of ZnO NPs films and (d) three layers of ZnO NPs films deposited on soda-lime glass.

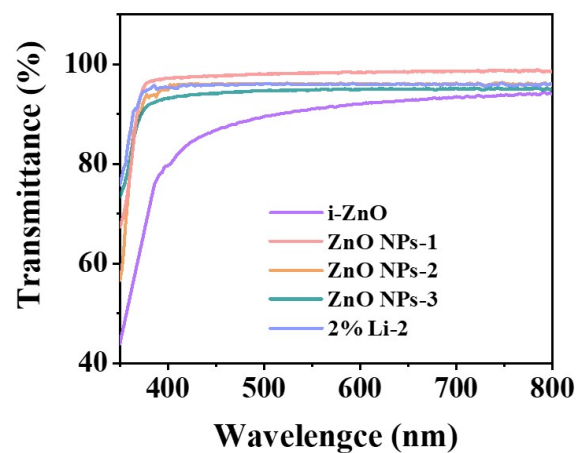

**Figure S12** Transmittance spectrum of the sputtered ZnO, pristine ZnO NPs (1, 2, 3 layers) and ZnO:Li NPs (2 layers) films deposited on soda-lime glass.

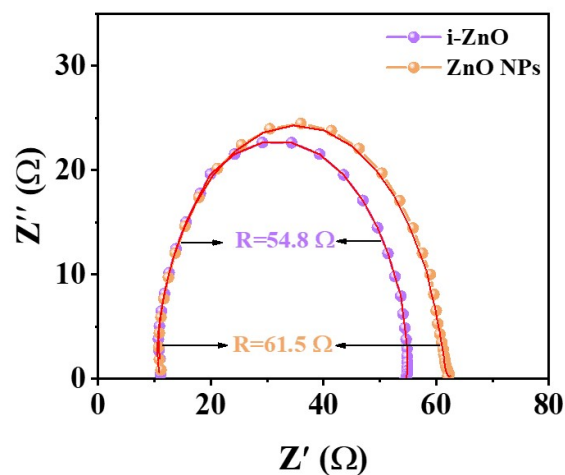

**Figure S13** EIS Nyquist diagrams for the CZTSSe solar cells with i-ZnO and ZnO NPs window layers measured under -0.45 V.

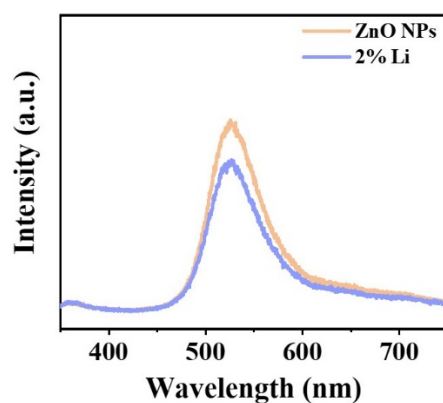

**Figure S14** PL of pristine ZnO NPs and 2% ZnO:Li NPs films.

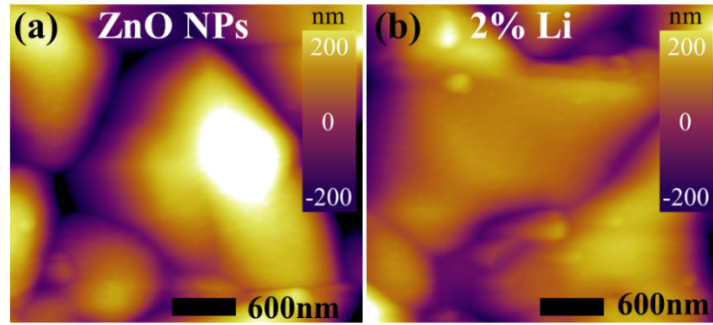

**Figure S15** Two dimensional atomic force microscopy images of ZnO NPs/CdS /CZTSSe stack and ZnO:Li NPs/CdS/CZTSSe stack.

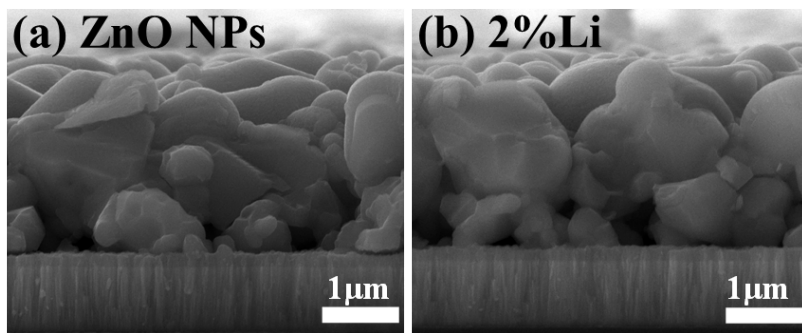

**Figure S16** Cross-section scanning morphology of EBIC for the CZTSSe solar cells using ZnO NPs and ZnO:Li NPs window layer.

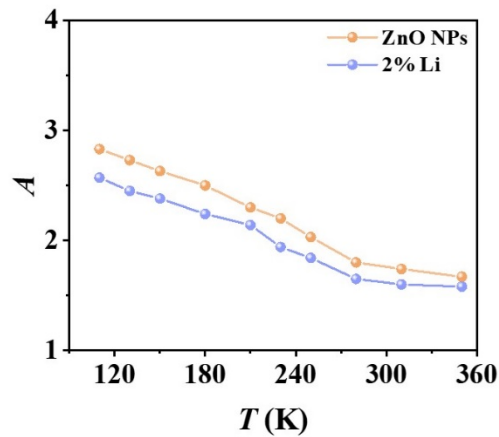

**Figure S17** (a) The temperature-dependent ideal factor  $A$  of CZTSSe solar cells with ZnO NPs and 2% Li doping ZnO layers with the range of 350-100 K under dark condition.
